# Supplementary material
Source: Springer Nature journal article supplement (https://www.springermedizin.de/resource/supplementary/13550_2013_177_MOESM11_ESM.pdf/9687748)

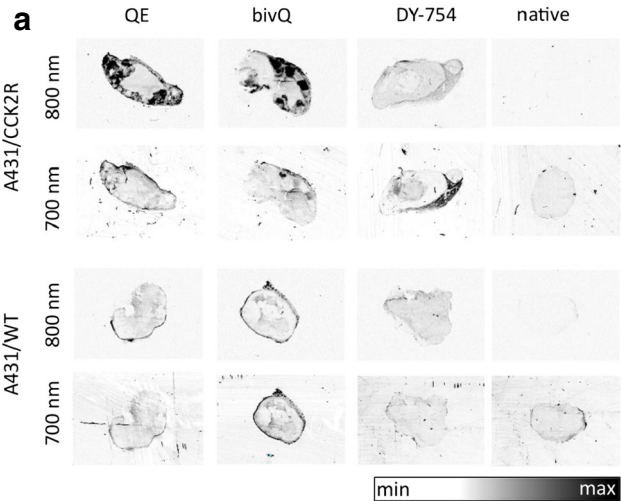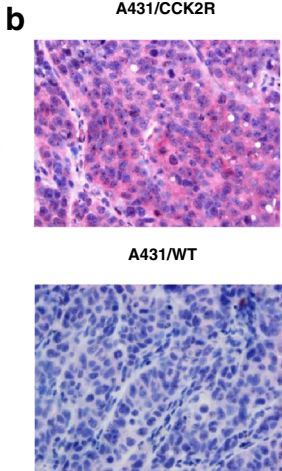

Supplement: MOESM11 [file 9687748]
